# Supplementary material for: Impact of HCV Eradication on Lipid Metabolism in HIV/HCV Coinfected Patients: Data from ICONA and HepaICONA Foundation Cohort Study
Source: MDPI journal article supplement (doi:10.3390/v13071402), 2021-07-19
Supplement: s1 [file s1]

**Figure S1.** Panel A and B. Directed acyclic graphs depicting the underlying assumptions of the ANCOVA models in order to estimate the cause effect of exposure on outcome.

A

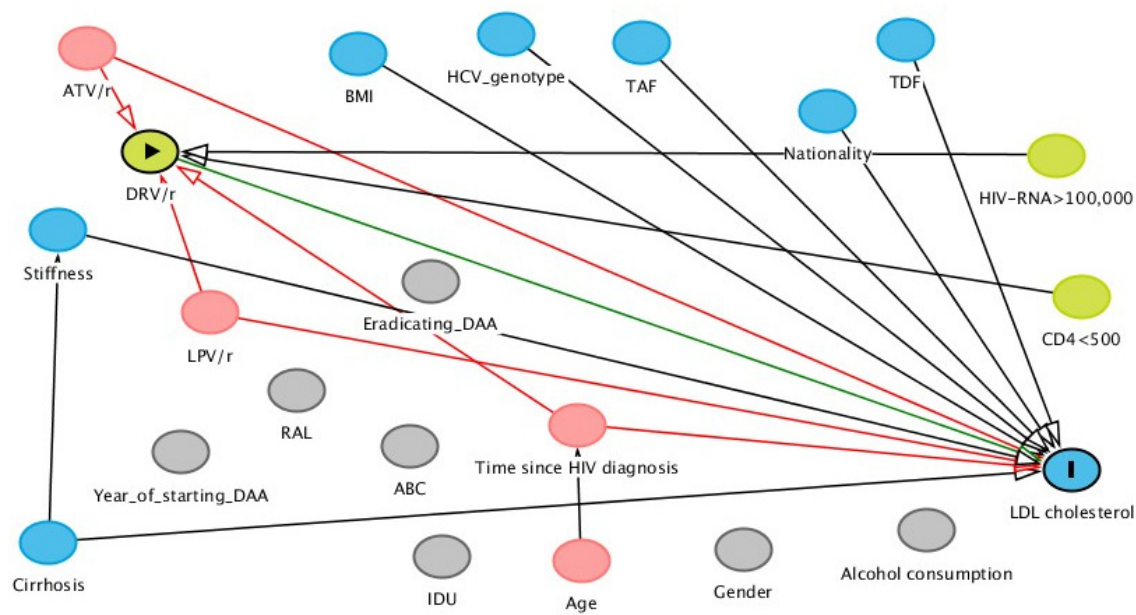

B

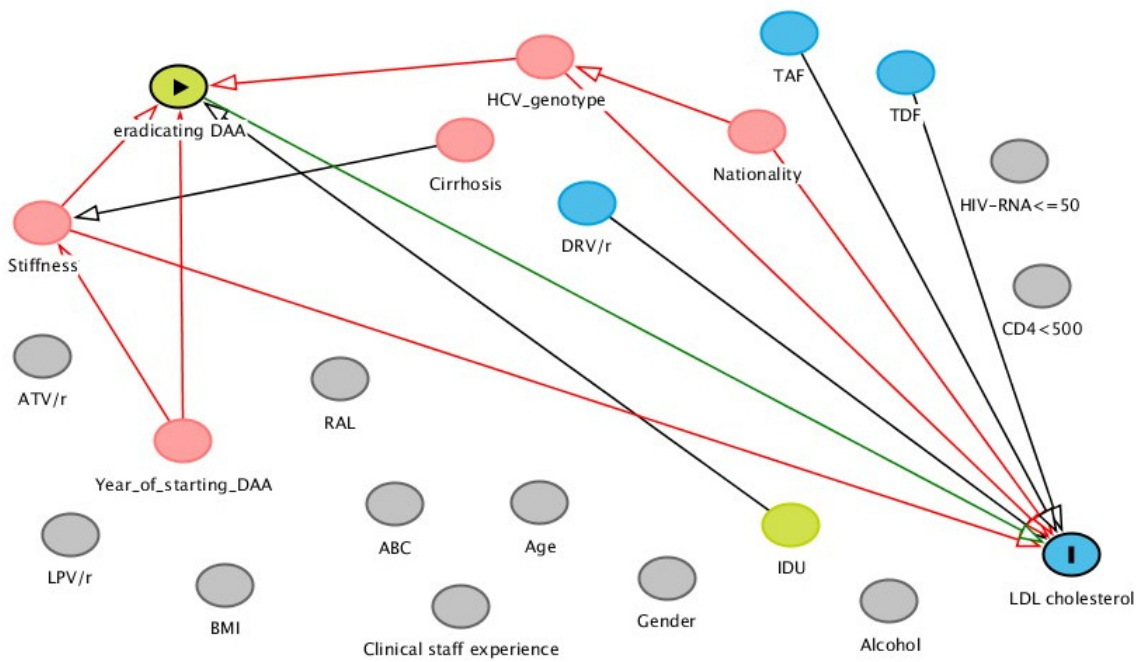

**Table S1.** Protocol codes and dates of approval of the study by Institutional Review Boards (or Ethics Committees) of all participants Centers.

| Center Code | IRB name                                                                                                       | Approval Date    | Approval Protocol N. |
|-------------|----------------------------------------------------------------------------------------------------------------|------------------|----------------------|
| A00         | Comitato Etico Locale per la Sperimentazione Clinica dell'Azienda Ospedaliera Luigi Sacco - Via G.B. Grassi,74 | 20 December 2007 | 10/08/69/07 AP       |

|     |                                                                                                                                                      |                   |                |
|-----|------------------------------------------------------------------------------------------------------------------------------------------------------|-------------------|----------------|
|     | - 20157 Milano                                                                                                                                       |                   |                |
| A01 | Comitato di Bioteica della ASL Sassari - Via Monte Grappa, 82 - 07100 Sassari                                                                        | 10 December 2007  | 348/L          |
| A04 | Comitato di Bioteica dell'Azienda Ospedali Riuniti di Bergamo - Largo Barozzi,1 - 24128 Bergamo                                                      | 15 October 2007   | 1932           |
| A05 | Comitato Etico dell'Azienda Osedaliero Universitaria di Cagliari - Via San Giorgio,12 - 09124 Cagliari                                               | 15 November 2007  | 261/07/CE      |
| A06 | Comitato Etico locale dell'Azienda USL 10 di Firenze - Ospedale Pietro Palagi - Viale Margherita,41 50125 Firenze                                    | 07 September 2007 | 0132246/67GP   |
| A07 | Comitato Etico Locale per la Sperimentazione Clinica dell'Azienda Ospedaliera Luigi Sacco - Via G.B. Grassi,74 - 20157 Milano                        | 20 December 2007  | 10/08/66/07 AP |
| A15 | Comitato Etico dell'Azienda Ospedaliera Universitaria "San Martino" di Genova - Largo Rossana Benzi,10 - 16132 Genova                                | 09 November 2007  | 115/2007       |
| A12 | Comitato Etico Palermo 1 - AOUP Policlinico Giaccone - Via del Vespro, 129 - 90127 Palermo                                                           | 18 January 2016   | V2016          |
| A13 | Comitato Etico dell' Azienda Ospedaliera-Polo Universitario San Paolo - Via A. di Rudini,8 - 20142 Milano                                            | 28 November 2007  | 44 CE/MA/CM    |
| A14 | Comitato Etico dell'Azienda Ospedaliera San Gerardo di Monza - Via Pergolesi,33 - 20052 Monza                                                        | 25 October 2007   | NA             |
| A16 | Comitato Etico Locale per la Sperimentazione Clinica dei Medicinali dell'Azienda Ospedaliera Universitaria Senese di Siena - Le Scotte - 53100 Siena | 17 March 2014     | NA             |
| A17 | Comitato Etico Indipendente Azienda Ospedaliero Universitaria di Cagliari - Via Ospedale 54 – 09124 Cagliari                                         | 30 January 2018   | PG/2018/1445   |
| A18 | Comitato Etico Regionale per la Sperimentazione Clinica della Regione Toscana Sezione: AREA VASTA CENTRO                                             | 16 July 2019      | 1188_oss       |
| A19 | Comitato Etico Milano Area 2 - Via Francesco Sforza 28 - 20122 Milano                                                                                | 19 February 2019  | 169_2019       |
| B00 | Comitato Etico della Fondazione Centro San Raffaele del Monte Tabor - Istituto Scientifico Ospedale San Raffaele - via Olgettina, 60 - 20132 Milano  | 12 July 2007      | NA             |
| B02 | Comitato Etico dell'Azienda Ospedaliera Osepdale Niguarda Ca' Granda - Piazza Ospedale Maggiore, 3 - 20162 Milano                                    | 14 September 2007 | NA             |
| B03 | Comitato etico di Area Vasta Romagna ed IRST - Viale Ghirotti, 286 - 47023 Cesena                                                                    | 19 September 2007 | 63687          |
| B04 | Comitato Etico per la Sperimentazione Clinica della Provincia di Vicenza - Via Ridolfi, 37 - 36100 Vicenza                                           | 12 September 2007 | 98/07          |
| B05 | Comitato Etico dell'Ente Ospedaliero Osepdali Galliera di Genova - Via delle Mura Cappuccine, 14 - 16128 Genova                                      | 18 July 2007      | RP/246/CE      |
| B06 | Comitato Etico per la Sperimentazione Clinica dei Medicinali della Provincia di Venezia - Via Don Federico Tosatto, 147 - 30174 Venezia              | 08 November 2007  | 29/CE          |
| B07 | Comitato Etico dell'Azienda USL di Latina - Via Canova,2 - 04100 Latina                                                                              | 04 October 2007   | 111/350        |
| B08 | Comitato Etico Indipendente dell'IRCCS CRO di Aviano - Via F. Gallini, 2 - 33081 Aviano (PN)                                                         | 14 November 2007  | 857/D          |
| B10 | Comitato Etico Unico per la Provincia di Parma - Via Gramsci, 14 - 43100 Parma                                                                       | 15 September 2007 | 26547          |

|     |                                                                                                                                                       |                   |                   |
|-----|-------------------------------------------------------------------------------------------------------------------------------------------------------|-------------------|-------------------|
| B11 | Comitato Etico Provinciale per la Sperimentazione Clinica - Viale Tre Martiri 45100 Rovigo                                                            | 17 June 2009      | 217/CEP           |
| B12 | Comitato Etico dell'Azienda Ospedaliero Universitaria Santa Maria della Misericordia di Udine - Via Colugna, 50 - 33100 Udine                         | 28 August 2012    | 51460             |
| B13 | Comitato Etico dell'Azienda Sanitaria dell'Alto Adige - Via L. Bohler 5 - 39100 Bolzano                                                               | 18 October 2018   | 77-2018           |
| C00 | Comitato Etico dell'Azienda Ospedaliera Spedali Civili di Brescia - Piazza Spedali Civili, 1 - 25123 Brescia                                          | 04 December 2007  | NA                |
| C02 | Comitato Etico dell'Azienda Ospedaliera "Istituti Ospitalieri" di Cremona - Viale Concordia,1 - 26100 Cremona                                         | 28 February 2008  | 5522/08-RN/RV     |
| C03 | Comitato di Bioetica della Fondazione IRCCS Policlinico "San Matteo" - Viale Golgi, 19 - 27100 Pavia                                                  | 25 June 2007      | NA                |
| C04 | Comitato Etico Interaziendale delle AA.SS.LL di Torino - Strada dell'Arrivore 25/A - 10154 Torino                                                     | 11 December 2007  | 000814/007B/2007  |
| C05 | Comitato Etico Interaziendale delle AA.SS.LL di Torino - Strada dell'Arrivore 25/A - 10154 Torino                                                     | 11 September 2007 | 000658/007B/2007  |
| C07 | Comitato Etico dell'Azienda Ospedaliera "Ospedale di Lecco" - Via dell'Eremo 9/11 - 23900 Lecco                                                       | 06 February 2008  | NA                |
| C09 | Comitato Etico dell'Azienda Ospedaliera Ospedale di Circolo di Busto Arsizio - Piazzale Solaro,3 - 21052 Busto Arsizio (VA)                           | 30 November 2007  | 42847             |
| D00 | Comitato Etico Indipendente dell'Azienda Ospedaliera-Universitaria di Bologna, Policlinico S.Orsola-Malpighi - Via Massarenti, 9 - 40138 Bologna      | 13 November 2007  | 125/2007/0/OSS    |
| D01 | Comitato Etico Provinciale di Reggio Emilia - Viale Risorgimento 57 - 42100 Reggio nell' Emilia                                                       | 03 September 2007 | 24781             |
| D02 | Comitato Etico per Sperimentazione Clinica della Provincia di Padova - Via Giustiniani, 1 - 35128 Padova                                              | 09 June 2016      | 3811/AO/16        |
| D04 | Comitato Etico Provinciale di Modena - Via del Pozzo 71 - 41100 Modena                                                                                | 06 November 2007  | 3039/CE           |
| D05 | Comitato Etico Provinciale di Ferrara - Corso Giovecca, 203 - 44100 Ferrara                                                                           | 24 July 2007      | NA                |
| D08 | Comitato Etico dell'Azienda Ospedaliero-Universitaria Ospedali Riuniti Umberto I- G.M. Lancisi - G. Salesi di Ancona – Via Conca 71 – 60126 Ancona    | 29 November 2007  | 2070211           |
| D09 | Comitato Etico dell'Azienda Ospedaliero-Universitaria Ospedali Riuniti Umberto I- G.M. Lancisi - G. Salesi di Ancona – Via Conca 71 – 60126 Ancona    | 29 November 2007  | 2070212           |
| D11 | Comitato Etico Interzonale della ASUR zona Territoriale 8 di Civitanova Marche e Zona Territoriale 9 di Macerata - Via Santa Lucia 2 - 62100 Macerata | 07 February 2008  | 60/INT/CEI/11263  |
| D12 | Comitato Etico per la Sperimentazione Clinica dei Farmaci della AUSL di Pescara - Via Fonte Romana, 14 - 65100 Pescara                                | 18 January 2010   | 006               |
| E00 | Comitato Etico dell'Università Cattolica del Sacro Cuore - Policlinico Universitario Agostino Gemelli di Roma - Largo A. Gemelli, 8 - 00168 Roma      | 13 September 2007 | 589/A1376/CE/2007 |
| E08 | Comitato Etico dell'IRCCS Istituto Nazionale per le Malattie Infettive "Lazzaro Spallanzani" di Roma - Via Portuense, 292 - 00149 Roma                | 01 August 2007    | 38/2007           |
| E05 | Comitato Etico per la Sperimentazione dei Medicinali dell'azienda Ospedaliera-Universitaria Careggi di Firenze - Viale Pieraccini, 28 - 50139 Firenze | 12 July 2007      | NA                |

|     |                                                                                                                                                   |                   |               |
|-----|---------------------------------------------------------------------------------------------------------------------------------------------------|-------------------|---------------|
| E06 | Comitato Etico delle Aziende Sanitarie dell'Umbria di Perugia - Via della Rivoluzione, 16 - 06070 Perugia                                         | 21 July 2008      | 1296/08       |
| E07 | Comitato Etico per le Attività Biomediche dell'Università degli Studi "Federico II" di Napoli - Via Pansini, 5 - 80135 Napoli                     | 24 February 2016  | 35-2016       |
| E10 | Comitato Etico dell'azienda Policlinico Umberto I di Roma - Viale del Policlinico, 155 - 00161 Roma                                               | 27 September 2007 | 1272          |
| E11 | 3 Roma Comitato Etico Indipendente dell'Azienda Ospedaliera Universitaria Policlinico Tor Vergata di Roma - Viale Oxford, 81 - 00133 Roma         | 27 November 2007  | NA            |
| E13 | Comitato Etico Centrale IRCCS Lazio-Sezione IRCCS IFO-Fondazione GB Bietti - Via Elio Chianesi, 53 - 00144 Roma                                   | 24 June 2014      | CE/38/14      |
| E15 | Comitato Etico Lazio 1 - Circonvallazione Gianicolense, 87 - 00152 Roma                                                                           | 13 January 2016   | 263/CELAZIO1  |
| E16 | Comitato Etico dell'Università "Sapienza" - Viale del Policlinico 155 - 00161 Roma                                                                | 23 April 2015     | 3617          |
| E17 | Comitato Etico delle Aziende Sanitarie della Regione dell'Umbria - Via della Rivoluzione, 16 - 06070 Ellera di Corciano (PG)                      | 16 March 2016     | 7925/16       |
| F00 | Comitato Etico Indipendente Locale dell'Azienda Ospedaliera Ospedale Policlinico Consorziato di Bari - Piazza Giulio Cesare, 11 - 70124 Bari      | 28 November 2007  | NA            |
| F01 | Comitato Etico dell'Azienda Ospedaliera Domenico Cotugno di Napoli - Via G. Quagliariello, 54 - 80131 Napoli                                      | 12 September 2007 | 32/2007       |
| F06 | Comitato di Etica per la Ricerca Biomedica dell'Università degli Studi "G. D'annunzio" e della ASL di Chieti - Via dei Vestini, 31 - 66013 Chieti | 30 October 2007   | 7713/R        |
| F08 | Comitato Etico Interprovinciale Area 1 dell' Azienda Ospedaliero Universitaria "Ospedali Riuniti" di Foggia - Viale Pinto 1 - 71100 Foggia        | 12 September 2019 | 79/CE/2019    |
| F13 | Comitato Etico Catania 2 - Piazza S. Maria di Gesù, 7 - 95123 Catania                                                                             | 24 June 2014      | NA            |
| F15 | Comitato Etico Catania 2 - Piazza S. Maria di Gesù, 7 - 95123 Catania                                                                             | 12 December 2017  | 42/2017/CECT2 |
| F16 | Comitato Etico di Messina - Via Consolare Valeria, 1 - 98125 Messina                                                                              | 16 May 2016       | 20/16         |

**Table S2.** Participants' biomarkers according to pair contributions, using the latest value in the alternative window [+6;+12] months for T1-T2. DAA direct antiviral agent; BMI body mass index; LDL low-density lipoprotein cholesterol; HDL high-density lipoprotein cholesterol; GGT Gamma-glutamyl transferase; INR international normalized ratio

|                                              | Pairs                          |       |       |       |       |            |         |                                     |       |       |       |       |            |         |
|----------------------------------------------|--------------------------------|-------|-------|-------|-------|------------|---------|-------------------------------------|-------|-------|-------|-------|------------|---------|
|                                              | T0-T1 (both pre-DAA treatment) |       |       |       |       |            |         | T1-T2 (pre and post DAA treatment)* |       |       |       |       |            |         |
| Biomarker                                    | N                              | Mean1 | SD1   | Mean2 | SD2   | Difference | P-value | N                                   | Mean1 | SD1   | Mean2 | SD2   | Difference | P-value |
| <b>BMI, kg/m<sup>2</sup> Median (IQR)</b>    | 139                            | 26.5  | 27.2  | 25.0  | 21.0  | -1.4       | 0.33    | 158                                 | 24.8  | 14.3  | 28.1  | 29.4  | 3.3        | 0.21    |
| <b>Blood glucose, mg/dL</b>                  | 551                            | 96.21 | 30.04 | 94.88 | 26.43 | -1.32      | 0.23    | 705                                 | 96.32 | 27.17 | 96.35 | 33.69 | 0.03       | 0.97    |
| <b>Creatinine mg/dl</b>                      | 658                            | 4.7   | 5.5   | 4.6   | 7.5   | -0.1       | 0.66    | 834                                 | 5.4   | 7.0   | 5.0   | 5.7   | -0.4       | 0.08    |
| <b>Total cholesterol, mg/dL Median (IQR)</b> | 432                            | 162.6 | 43.1  | 161.5 | 42.2  | -1.2       | 0.37    | 487                                 | 161.1 | 40.9  | 183.7 | 40.3  | 22.6       | <.01    |

|                                            |     |       |       |       |       |       |      |     |       |       |       |       |       |      |
|--------------------------------------------|-----|-------|-------|-------|-------|-------|------|-----|-------|-------|-------|-------|-------|------|
| <b>LDL cholesterol, mg/dL Median (IQR)</b> | 170 | 96.6  | 38.8  | 94.6  | 37.7  | -2.0  | 0.27 | 191 | 91.7  | 33.9  | 112.2 | 31.9  | 20.6  | <.01 |
| <b>HDL cholesterol, mg/dL Median (IQR)</b> | 249 | 44.1  | 14.9  | 44.1  | 14.4  | 0.0   | 0.98 | 287 | 45.7  | 16.9  | 46.4  | 14.6  | 0.7   | 0.33 |
| <b>Tryglicerides Median (IQR)</b>          | 431 | 137.2 | 83.0  | 134.6 | 78.1  | -2.6  | 0.45 | 488 | 134.7 | 78.0  | 133.5 | 75.3  | -1.2  | 0.73 |
| <b>ALT, mg/dL</b>                          | 667 | 83.79 | 78.14 | 78.24 | 62.42 | -5.56 | 0.02 | 847 | 79.92 | 63.25 | 26.06 | 19.96 | -53.9 | <.01 |
| <b>AST, mg/dL</b>                          | 614 | 66.49 | 49.84 | 64.08 | 42.65 | -2.41 | 0.13 | 788 | 66.96 | 46.41 | 27.05 | 13.15 | -39.9 | <.01 |
| <b>GGT, mg/dL</b>                          | 417 | 126.6 | 169.7 | 109.3 | 112.2 | -17.3 | <.01 | 505 | 111.1 | 119.2 | 47.27 | 91.67 | -63.8 | <.01 |
| <b>Total bilirubin, mg/dL</b>              | 641 | 0.68  | 0.92  | 0.66  | 1.04  | -0.03 | 0.49 | 788 | 0.66  | 1.02  | 0.53  | 0.75  | -0.13 | <.01 |
| <b>Platelets/mm<sup>3</sup></b>            | 670 | 173.8 | 77.7  | 170.4 | 70.9  | -3.4  | 0.02 | 865 | 334.1 | 5027  | 179.2 | 72.6  | -155  | 0.36 |
| <b>INR</b>                                 | 98  | 0.95  | 0.35  | 0.98  | 0.34  | 0.03  | 0.55 | 121 | 1.01  | 0.35  | 0.98  | 0.41  | -0.03 | 0.42 |
| <b>CD4 count, cells/mm<sup>3</sup></b>     | 731 | 689.2 | 706.7 | 860.6 | 3807  | 171.4 | 0.22 | 893 | 828.6 | 3498  | 699.9 | 540.2 | -129  | 0.27 |
| <b>CD8 count, cells/mm<sup>3</sup></b>     | 669 | 923.9 | 498.8 | 926.0 | 546.3 | 2.14  | 0.87 | 767 | 923.9 | 585.8 | 987.1 | 643.7 | 63.20 | <.01 |
| <b>CD4/CD8 ratio</b>                       | 669 | 0.79  | 0.43  | 0.94  | 3.02  | 0.15  | 0.21 | 767 | 1.16  | 5.71  | 1.44  | 16.77 | 0.28  | 0.66 |
| <b>HIV RNA log<sub>10</sub> cp/mL</b>      | 658 | 0.92  | 1.08  | 0.78  | 0.90  | -0.15 | <.01 | 819 | 0.77  | 0.90  | 0.70  | 0.88  | -0.07 | 0.05 |

\*Using the latest value in the alternative window [+6; +12]

**Table S3.** Pair analyses for all biomarkers, performed removing the 82 patients for which only pre-DAA biomarkers measurements were available. BMI body mass index; HCC hepatocellular carcinoma; LDL low-density lipoprotein cholesterol; HDL high-density lipoprotein cholesterol; GGT Gamma-glutamyl transferase; INR international normalized ratio.

| Biomarker                              | Pairs                          |       |       |       |       |       |         |                                    |       |       |       |       |       |         |
|----------------------------------------|--------------------------------|-------|-------|-------|-------|-------|---------|------------------------------------|-------|-------|-------|-------|-------|---------|
|                                        | T0-T1 (both pre-DAA treatment) |       |       |       |       |       |         | T1-T2 (pre and post DAA treatment) |       |       |       |       |       |         |
|                                        | N                              | Mean1 | SD1   | Mean2 | SD2   | Δ     | p-value | N                                  | Mean1 | SD1   | Mean2 | SD2   | Δ     | p-value |
| <b>BMI kg/m<sup>2</sup></b>            | 139                            | 26.5  | 27.2  | 25.0  | 21.0  | -1.4  | 0.33    | 237                                | 26.1  | 23.3  | 28.4  | 32.0  | 2.3   | 0.19    |
| <b>Blood glucose, mg/dL</b>            | 551                            | 96.21 | 30.04 | 94.88 | 26.43 | -1.32 | 0.23    | 868                                | 95.46 | 26.68 | 95.31 | 26.97 | -0.16 | 0.82    |
| <b>Creatinine mg/dl</b>                | 658                            | 0.7   | 0.5   | 0.8   | 4.0   | 0.1   | 0.39    | 1027                               | 0.8   | 3.2   | 0.7   | 0.7   | -0.1  | 0.39    |
| <b>Total cholesterol mg/dl</b>         | 350                            | 162.0 | 43.3  | 160.4 | 42.2  | -1.6  | 0.29    | 617                                | 162.0 | 40.7  | 183.5 | 41.0  | 21.4  | <.01    |
| <b>LDL cholesterol mg/dl</b>           | 126                            | 96.3  | 39.5  | 92.2  | 35.6  | -4.0  | 0.04    | 235                                | 91.9  | 34.3  | 114.4 | 32.2  | 22.4  | <.01    |
| <b>HDL cholesterol mg/dl</b>           | 189                            | 43.2  | 15.0  | 43.4  | 14.6  | 0.3   | 0.70    | 358                                | 45.9  | 16.7  | 46.5  | 14.3  | 0.5   | 0.41    |
| <b>Triglycerides mg/dl</b>             | 350                            | 141.9 | 86.8  | 138.1 | 81.8  | -3.8  | 0.36    | 615                                | 132.8 | 75.7  | 134.9 | 81.2  | 2.1   | 0.52    |
| <b>ALT, mg/dL</b>                      | 587                            | 84.55 | 79.86 | 77.81 | 62.09 | -6.74 | <.01    | 1002                               | 79.31 | 63.92 | 25.68 | 19.21 | -53.6 | <.01    |
| <b>AST, mg/dL</b>                      | 539                            | 67.44 | 51.44 | 63.90 | 42.06 | -3.53 | 0.04    | 946                                | 66.19 | 46.96 | 27.32 | 15.75 | -38.9 | <.01    |
| <b>GGT, mg/dL</b>                      | 364                            | 127.0 | 169.5 | 107.5 | 105.8 | -19.5 | <.01    | 638                                | 108.3 | 116.9 | 47.41 | 91.58 | -60.9 | <.01    |
| <b>Total bilirubin, mg/dL</b>          | 563                            | 0.68  | 0.94  | 0.67  | 1.08  | -0.02 | 0.70    | 944                                | 0.67  | 1.02  | 0.55  | 0.79  | -0.12 | <.01    |
| <b>Platelets/mm<sup>3</sup></b>        | 589                            | 171.8 | 79.1  | 168.9 | 72.0  | -2.9  | 0.06    | 1010                               | 313.2 | 4652  | 178.3 | 71.8  | -135  | 0.36    |
| <b>INR</b>                             | 85                             | 0.96  | 0.35  | 0.97  | 0.36  | 0.00  | 0.95    | 184                                | 0.96  | 0.38  | 1.00  | 0.37  | 0.04  | 0.23    |
| <b>CD4 count, cells/mm<sup>3</sup></b> | 649                            | 687.8 | 734.2 | 862.0 | 4015  | 174.2 | 0.26    | 1013                               | 805.2 | 3268  | 737.3 | 754.8 | -67.9 | 0.51    |

|                                                  |     |       |       |       |       |       |      |     |       |       |       |       |       |      |
|--------------------------------------------------|-----|-------|-------|-------|-------|-------|------|-----|-------|-------|-------|-------|-------|------|
| <b><i>CD8 count, cells/mm<sup>3</sup></i></b>    | 595 | 925.0 | 492.4 | 924.8 | 529.1 | -0.13 | 0.99 | 874 | 915.0 | 553.3 | 959.9 | 576.5 | 44.86 | <.01 |
| <b><i>CD4/CD8 ratio</i></b>                      | 595 | 0.78  | 0.42  | 0.94  | 3.20  | 0.16  | 0.22 | 874 | 1.13  | 5.35  | 2.54  | 49.80 | 1.41  | 0.41 |
| <b><i>HIV RNA log<sub>10</sub><br/>cp/mL</i></b> | 587 | 0.93  | 1.08  | 0.79  | 0.91  | -0.14 | <.01 | 931 | 0.78  | 0.90  | 0.69  | 0.90  | -0.09 | <.01 |
